# Supplementary material for: The superior mineralization potential of a graphitic carbon nitride/titanium dioxide composite and its application in the construction of a portable photocatalytic air purification system against gaseous formaldehyde
Source: Royal Society of Chemistry journal article supplement (doi:10.1039/d4ta05212a), 2024-01-01
Supplement: d4ta05212a1.pdf [file d4ta05212a1.pdf]

1

## Supplementary Information

2

### 3 **S1] Estimation approach for the total number of photons.**

4 The total number of photons was calculated, considering the photon energy, wavelength,  
5 and irradiation time

6

7 Photon energy (J) =  $hc / \lambda$  (Eq. S1)

8 where h is the Planck constant, c is the speed of light, and  $\lambda$  is the photon wavelength.

9

10 Photons per second = photon energy (J) / lamp power (J s<sup>-1</sup>) (Eq. S2)

11

12 Total number of photons = photons per second (photons s<sup>-1</sup>) · reaction time (s<sup>-1</sup>) (Eq. S3)

13

14

15 **Table S1.** Specifications of the filter and air purifier (AP) codes for the AP platform.

| <b>Order</b> | <b>AP code</b> | <b>Filter code</b>                 | <b>Filter type</b>                                                       |
|--------------|----------------|------------------------------------|--------------------------------------------------------------------------|
| 1            | AP (CNT-n)     | HC-CNT-n                           | HC filter fabricated using CNT-n photocatalyst.                          |
| 2            | AP (P25)       | HC-TiO <sub>2</sub>                | HC filter fabricated using TiO <sub>2</sub> in the lab                   |
| 3            | AP (CN)        | HC-g-C <sub>3</sub> N <sub>4</sub> | HC filter fabricated using g-C <sub>3</sub> N <sub>4</sub> photocatalyst |
| 4            | AP (O)         | HC-O                               | HC filter installed in commercial AP                                     |
| 5            | AP (B)         | HC-B                               | Blank honeycomb filter                                                   |

16

17

18 **Table S2.** Natural decay rate of FA vapor at varying concentrations.

---

| <b>Order</b> | <b>Initial concentration</b> | <b>R<sup>2</sup></b> | <b>Natural decay rate</b>   |
|--------------|------------------------------|----------------------|-----------------------------|
|              | <b>(ppm)</b>                 |                      | <b>(L min<sup>-1</sup>)</b> |
| 1            | 0.5                          | 0.948                | 0.009                       |
| 2            | 1                            | 0.983                | 0.011                       |
| 3            | 2                            | 0.997                | 0.011                       |
| 4            | 5                            | 0.987                | 0.015                       |

---

20 **Table S3.** Surface properties of the tested CNT-n, TiO<sub>2</sub>, and g-C<sub>3</sub>N<sub>4</sub> photocatalysts.

| <b>Order</b> | <b>Catalyst</b>                 | <b>S<sub>BET</sub><br/>(m<sup>2</sup> g<sup>-1</sup>)</b> | <b>Pore volume<br/>(cm<sup>3</sup> g<sup>-1</sup>)</b> | <b>Average pore diameter<br/>(nm)</b> |
|--------------|---------------------------------|-----------------------------------------------------------|--------------------------------------------------------|---------------------------------------|
| 1            | CNT-1                           | 41.6                                                      | 0.0505                                                 | 4.49                                  |
| 2            | CNT-0.5                         | 42.9                                                      | 0.0572                                                 | 4.51                                  |
| 3            | CNT-0.1                         | 45.3                                                      | 0.0581                                                 | 4.65                                  |
| 4            | CNT-0.02                        | 46.1                                                      | 0.0612                                                 | 4.78                                  |
| 5            | TiO <sub>2</sub>                | 50.8                                                      | 0.0678                                                 | 4.44                                  |
| 6            | g-C <sub>3</sub> N <sub>4</sub> | 9.57                                                      | 0.0124                                                 | 4.37                                  |

21

22

23 **Table S4.** XPS data for the CNT-0.02, g-C<sub>3</sub>N<sub>4</sub>, and TiO<sub>2</sub> catalysts.

| Sample                          | Peak  | Binding energy<br>(eV) | Assignment           | Element<br>(atomic %) |      |
|---------------------------------|-------|------------------------|----------------------|-----------------------|------|
| CNT-0.02                        | C 1s  | 285                    | CC/C=C               | 13.3                  |      |
|                                 |       | 286.5                  | CN                   |                       |      |
|                                 | N 1s  | 288.5                  | C(N) <sub>3</sub>    |                       |      |
|                                 |       | 399.2                  | CN=C                 |                       |      |
|                                 |       | 401.1                  | N(C) <sub>3</sub>    |                       |      |
|                                 |       | 458.4                  | Ti 2p <sub>3/2</sub> |                       |      |
|                                 | Ti 2p | 464.2                  | Ti 2p <sub>1/2</sub> |                       | 56.2 |
|                                 |       | O 1s                   | 529.5                |                       | Ti-O |
| 531.7                           | Ti-OH |                        |                      |                       |      |
| g-C <sub>3</sub> N <sub>4</sub> | C 1s  | 285                    | CC/C=C               | 44.5                  |      |
|                                 |       | 286.5                  | CN                   |                       |      |
|                                 | N 1s  | 288.5                  | C(N) <sub>3</sub>    |                       |      |
|                                 |       | 398.9                  | CN=C                 |                       |      |
|                                 |       | 400.8                  | N(C) <sub>3</sub>    |                       |      |
| TiO <sub>2</sub>                | Ti 2p | 458.5                  | Ti 2p <sub>3/2</sub> | 16.4                  |      |
|                                 |       | 464.3                  | Ti 2p <sub>1/2</sub> |                       |      |
|                                 | O 1s  | 529.6                  | Ti-O                 |                       |      |
|                                 |       | 531.8                  | Ti-OH                |                       |      |

25 **Table S5.** Intermediates identified through an *in situ* DRIFTS analysis of CNT-0.02 during FA removal in dark and light conditions.

| Order | Intermediate                    | Wavelength<br>(cm <sup>-1</sup> ) | Assignment             | Note                                                                                                                                                                                        |
|-------|---------------------------------|-----------------------------------|------------------------|---------------------------------------------------------------------------------------------------------------------------------------------------------------------------------------------|
| 1     | Dioxymethylene<br>(DOM)         | 1064, 1116, 1158, 1174, and 1253  | v(CO)                  | 1. An increase in the DOM peak during the adsorption process indicates the surface consumption of bonded OH groups, allowing the adsorption of DOM species onto the photocatalytic surface. |
|       |                                 | 1417                              | δ(CH <sub>2</sub> )    |                                                                                                                                                                                             |
|       |                                 | 2762, 2861, 2911, and 2960        | v(CH <sub>2</sub> )    | 2. Under UV exposure, peaks of DOM species and formate ions decrease and increase, respectively, indicating the conversion of DOM species into formate ions due to oxidation.               |
| 2     | Formate<br>(HCOO <sup>-</sup> ) | 1360                              | vs(COO <sup>-</sup> )  |                                                                                                                                                                                             |
|       |                                 | 1572                              | vas(COO <sup>-</sup> ) | 3. The introduction of humidity leads to an increase in OH peaks, forming hydroxyl groups, followed by a decrease in DOM and formate species.                                               |

- 1 Turn on the Formaldehyde (FA) sensor and seal the chamber.
- 2 Purge the chamber with zero air gas through the inlet.
- 3 Inject the FA gas standard into the chamber through a syringe.
- 4 Wait until the target concentration is stable.
- 5 Turn on the air purifier and record the change in concentration displayed on the sensor.

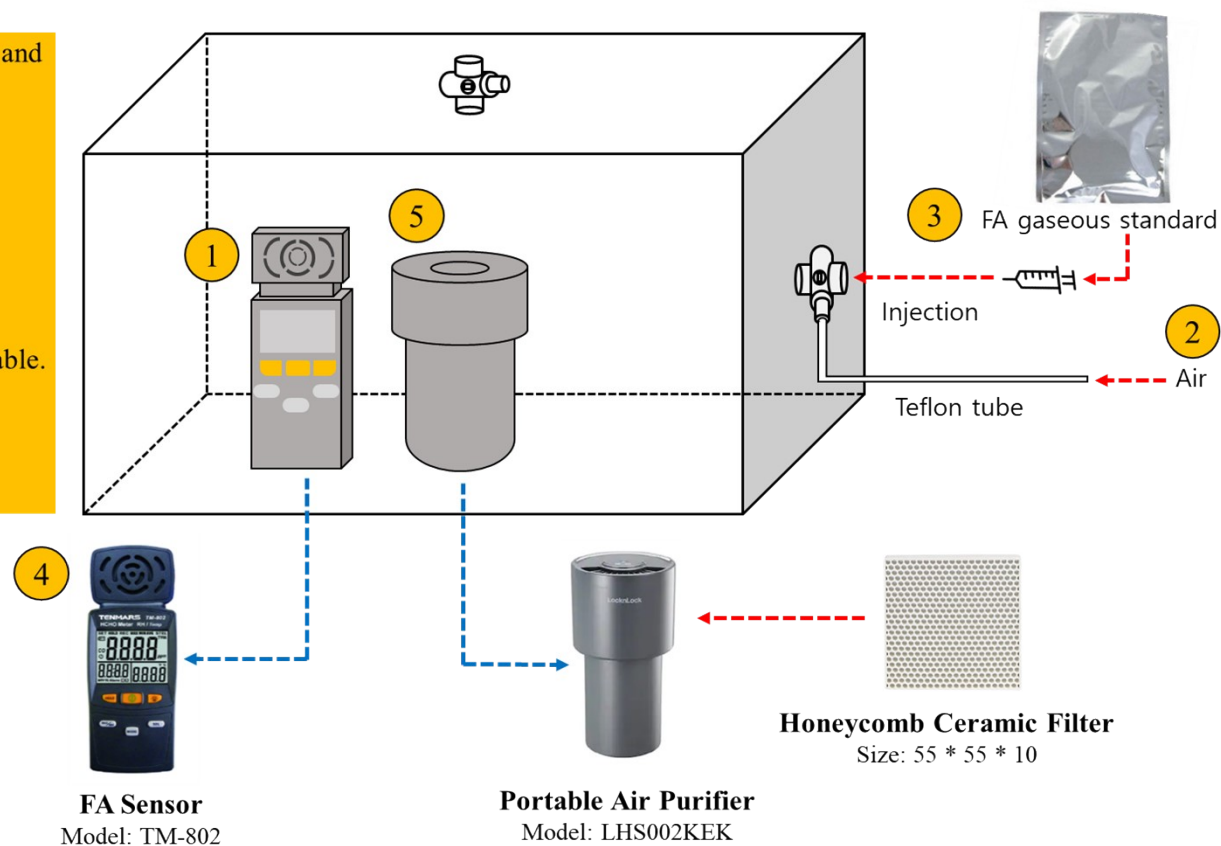

27

28

29 **Figure S1.** Schematic diagram of a photocatalytic oxidation system for FA removal.

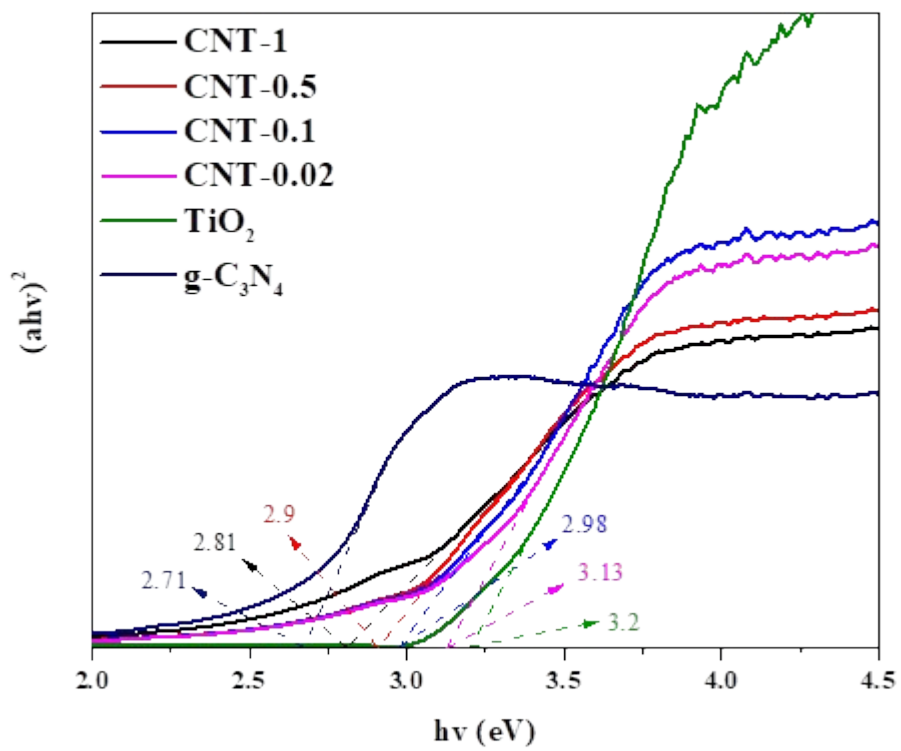

30

31 **Figure S2.** Band gap energy profiles for the as-prepared CNT-n composites (relative to  $\text{TiO}_2$   
 32 and  $\text{g-C}_3\text{N}_4$ ).



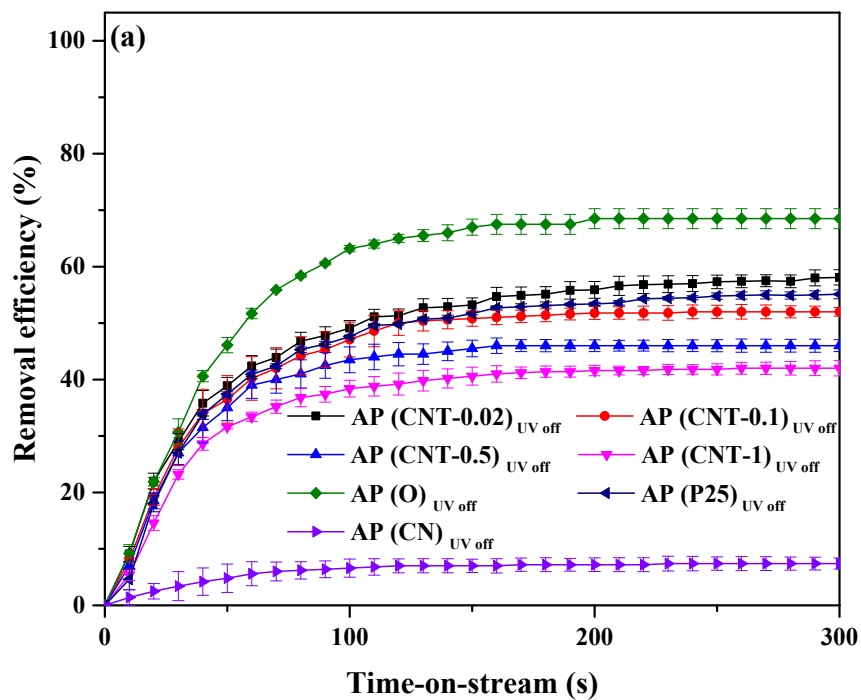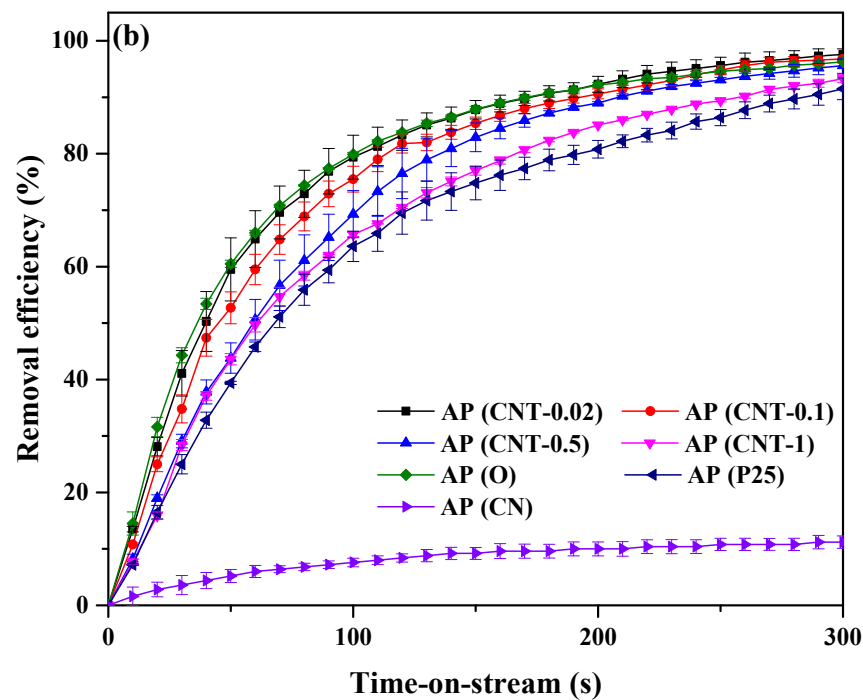

33

34 **Figure S3.** The removal efficiency of 5 ppm FA by AP (CNT-*n*) filters (relative to the reference AP (O), AP (P25), and AP (CN) filters) in a dry  
 35 atmosphere (0% RH) at 160 mL min<sup>-1</sup> AP circulation rate: (a) adsorption in dark conditions and (b) photocatalysis under 42.1 mW cm<sup>-2</sup> UV-A  
 36 irradiation.

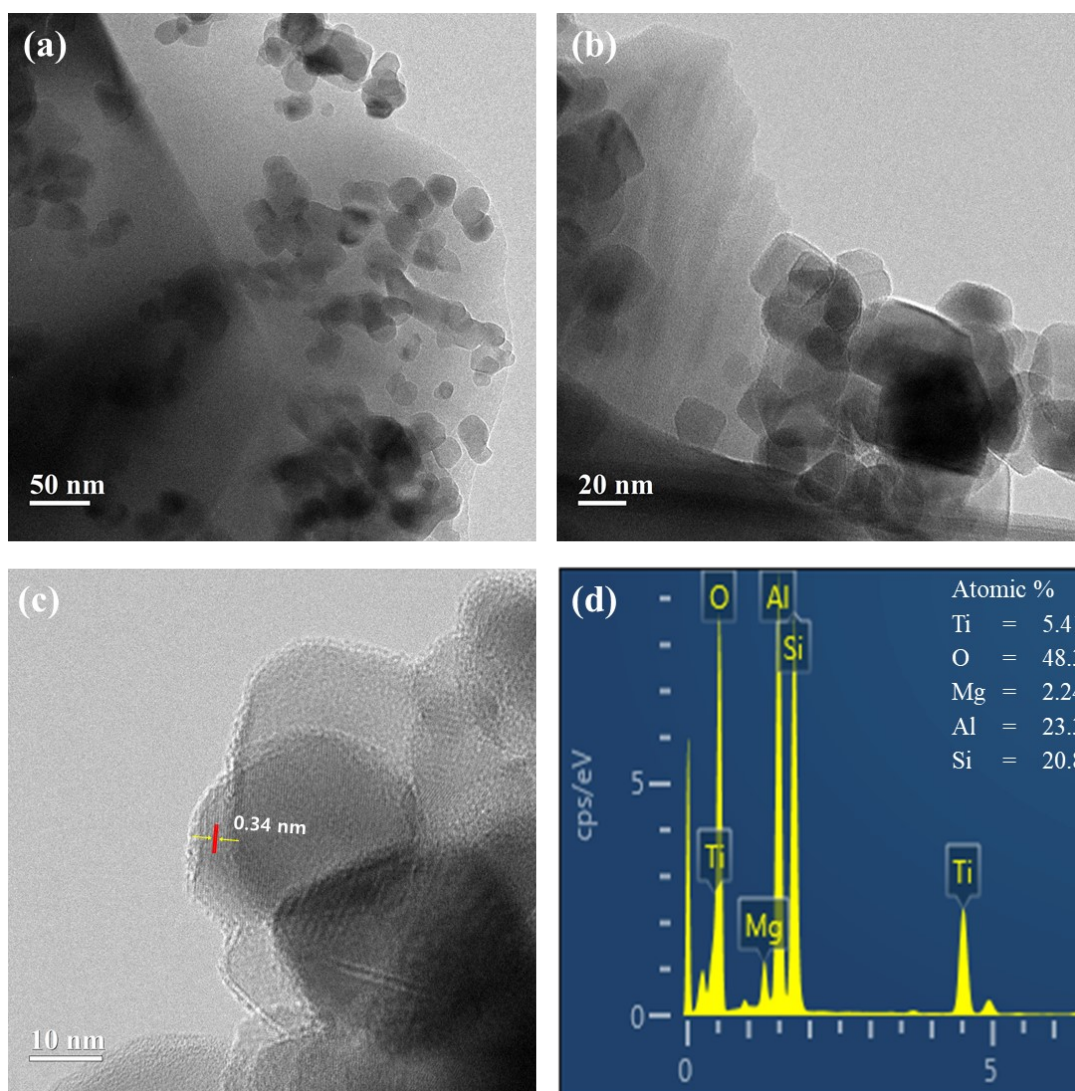

37

38 **Figure S4.** Morphological characterization of the HC-O material: (a–c) TEM images and  
39 (d) EDS analysis.

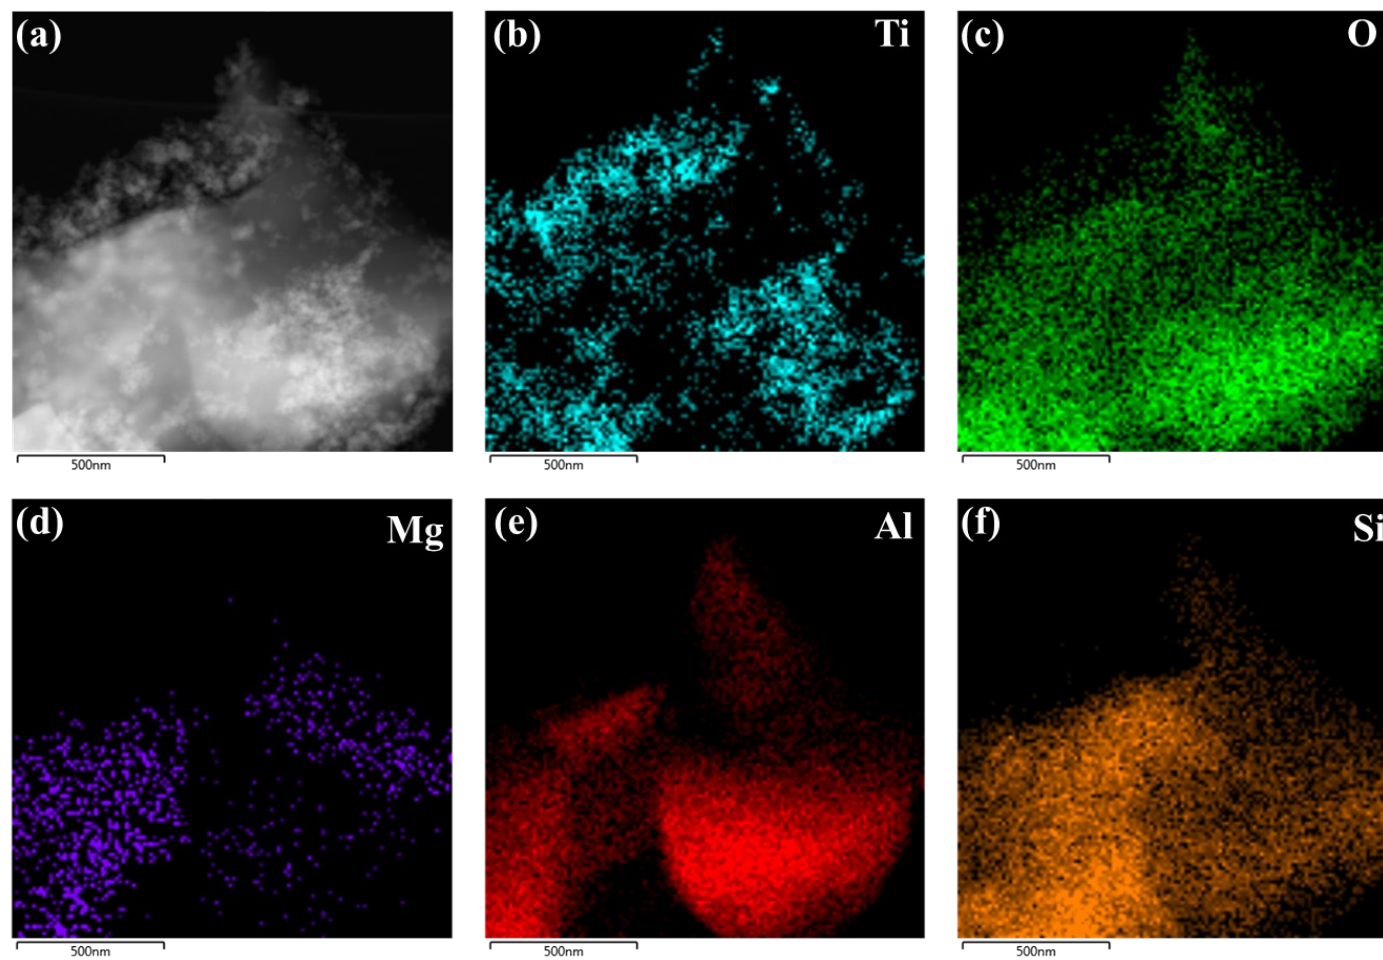

40

41 **Figure S5.** EDS images of HC-O (a) Selected region and (b) Ti, (c) O, (d) Mg, (e) Al, and (f) Si

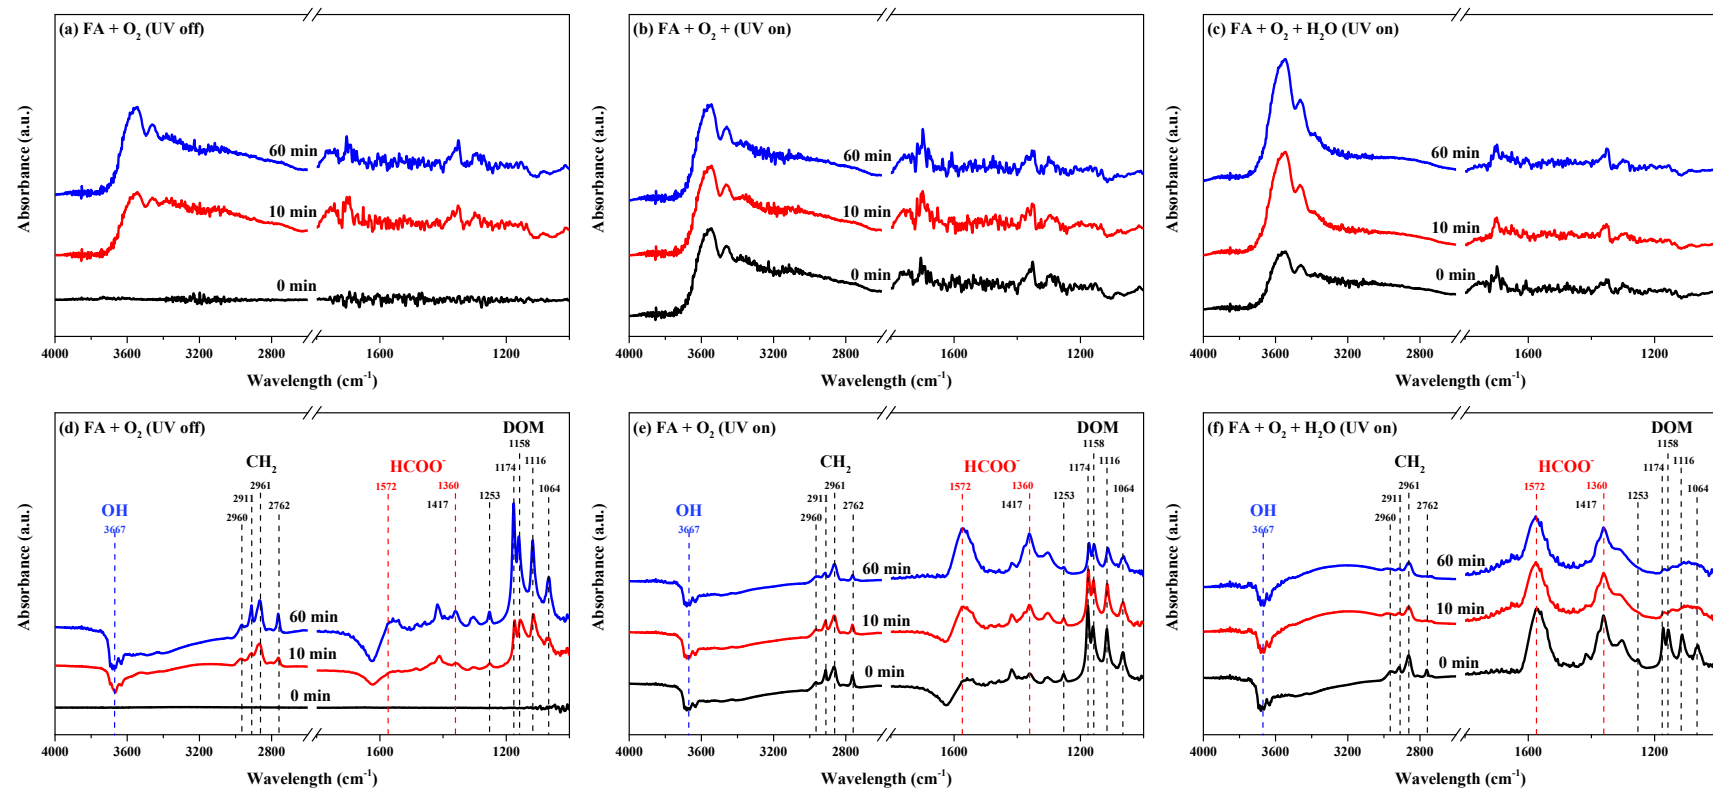

42

43

44 **Figure S6.** *In situ* DRIFTS spectra of the tested photocatalysts against FA removal in dark and light conditions: (a) g-C<sub>3</sub>N<sub>4</sub> (FA + air + UV off), (b) g-C<sub>3</sub>N<sub>4</sub> (FA + air + UV on),  
 45 (c) g-C<sub>3</sub>N<sub>4</sub> (FA + air + H<sub>2</sub>O + UV on), (d) TiO<sub>2</sub> (FA + air + UV off), (e) TiO<sub>2</sub> (FA + air + UV on), and (f) TiO<sub>2</sub> (FA + air + H<sub>2</sub>O + UV on).

46
